# Supplementary material for: Catalytic performance of a pyrolyzed graphene supported Fe–N–C composite and its application for acid direct methanol fuel cells
Source: Royal Society of Chemistry journal article supplement (doi:10.1039/c6ra20593c), 2016-01-01
Supplement: c6ra20593c1.pdf [file c6ra20593c1.pdf]

## Supplementary Materials

### **Catalytic performance of pyrolyzed graphene supported Fe-N-C composite and its application for acid direct methanol fuel cells**

Jingjing Xi<sup>a</sup>, Fang Wang<sup>b</sup>, Riguo Mei<sup>b</sup>, Zhijie Gong<sup>a</sup>, Xianping Fan<sup>a</sup>, Hui Yang<sup>a</sup>, Liang An<sup>c</sup>,  
Qixing Wu<sup>b\*</sup>, Zhongkuan Luo<sup>a,b\*</sup>

<sup>a</sup> Zhejiang California International NanoSystems Institute & Department of Materials Science and Engineering, Zhejiang University, 38 Zhe Da Road, Hangzhou, 310000, China

<sup>b</sup> Shenzhen Key Laboratory of New Lithium-ion Batteries and Mesoporous Materials, College of Chemistry and Environmental Engineering Shenzhen University, 3688 Nanshan Avenue, Nanshan District, Shenzhen, 518060, China

<sup>c</sup> Department of Mechanical Engineering, the Hong Kong Polytechnic University, Hung Hom, Kowloon, Hong Kong SAR, China

\*Corresponding authors. E-mail address: qxwu@szu.edu.cn (Q.X. Wu) and lzk@szu.edu.cn (Z. K. Luo); Tel: +86-755-26557249; Fax: +86-755-26536141.

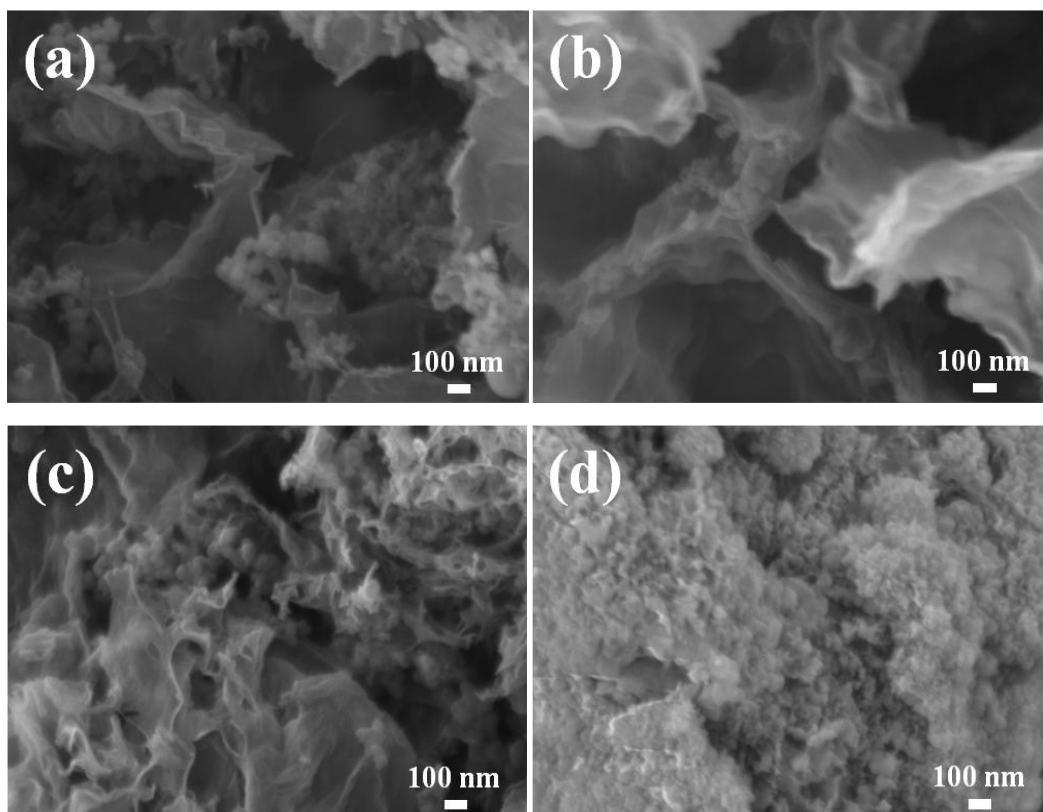

Fig. S1 FESEM images of Fe-N/C/rGO catalysts with different Fe contents of 5 wt % (a), 10 wt % (b) 15 wt % (c) and 20 wt % (d).

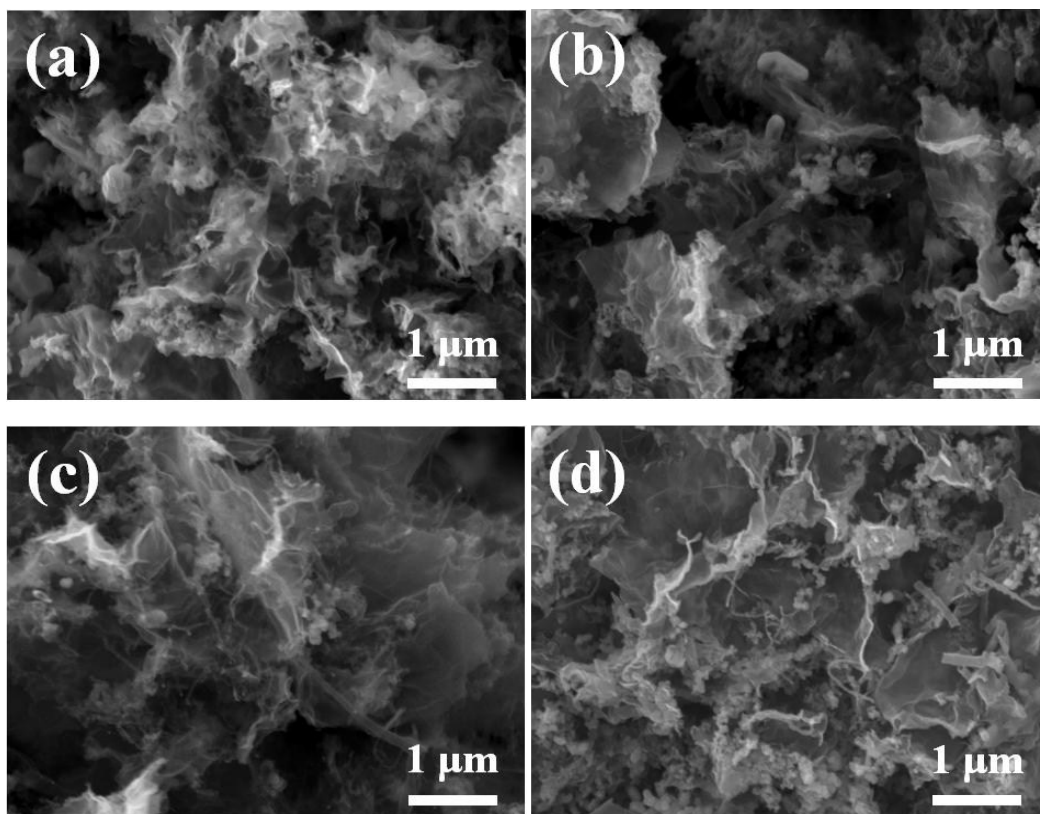

Fig. S2 FESEM images of Fe-N/C/rGO catalysts at different pyrolysis temperatures 650 °C (a), 750 °C (b), 850 °C (c) and 950 °C (d).

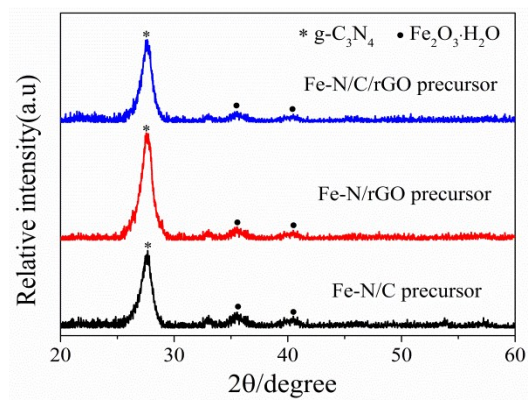

Fig. S3 XRD patterns of Fe-N/C, Fe-N/rGO, Fe-N/C/rGO precursors.

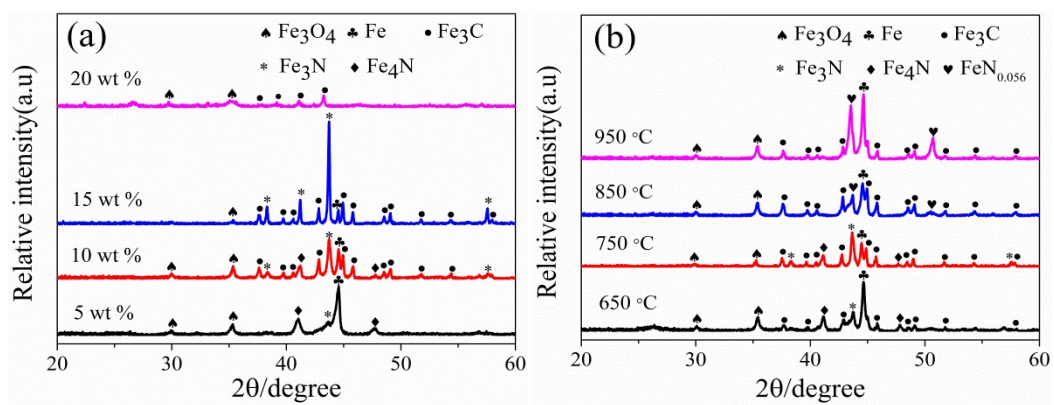

Fig. S4 XRD patterns of Fe-N/C/rGO catalysts with different Fe contents (a) and Fe-N/C/rGO catalysts at different pyrolysis temperatures (b).

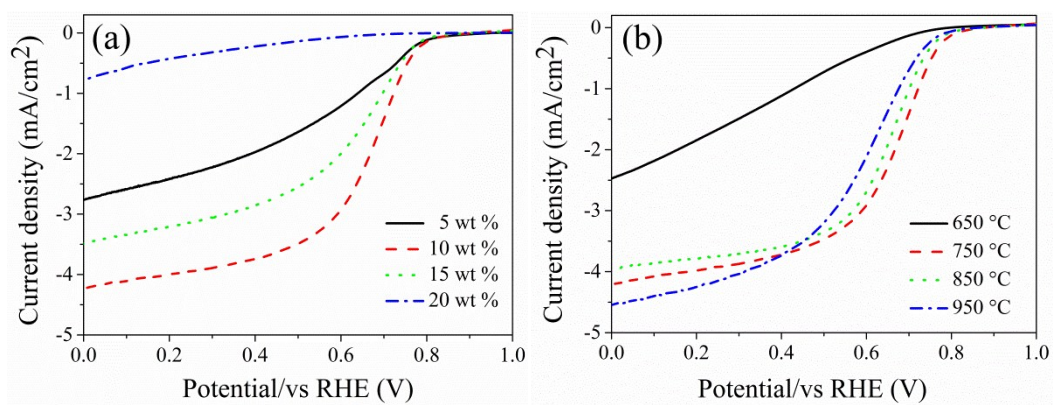

Fig. S5 LSV curves of Fe-N/C/rGO catalysts with different Fe contents (a) and Fe-N/C/rGO catalysts at different pyrolysis temperatures (b) in O<sub>2</sub>-saturated 0.5 M H<sub>2</sub>SO<sub>4</sub> solution at the rotating speed of 1600 rpm and the scan rate of 5 mV s<sup>-1</sup>.

Table S1 Surface areas and pore volumes of Fe-N/C/rGO catalysts with different Fe contents of at different pyrolysis temperatures.

| Samples    | Pyrolysis temperature<br>(°C) | Fe content<br>(wt %) | S <sub>BET</sub><br>(m <sup>2</sup> g <sup>-1</sup> ) | V <sub>pore</sub><br>(cm <sup>3</sup> g <sup>-1</sup> ) |
|------------|-------------------------------|----------------------|-------------------------------------------------------|---------------------------------------------------------|
| Fe-N/C/rGO | 750                           | 5                    | 260                                                   | 0.83                                                    |
|            | 750                           | 10                   | 256                                                   | 0.87                                                    |
|            | 750                           | 15                   | 176                                                   | 0.25                                                    |
|            | 750                           | 20                   | 11.6                                                  | 0.04                                                    |
|            | 650                           | 10                   | 60.7                                                  | 0.37                                                    |
|            | 850                           | 10                   | 214                                                   | 0.51                                                    |
|            | 950                           | 10                   | 184                                                   | 0.46                                                    |

Table S2 N contents of Fe-N/C/rGO catalysts with different Fe contents of at different pyrolysis temperatures.

| Samples    | Pyrolysis temperature (°C) | Fe content (wt %) | N (wt %) |
|------------|----------------------------|-------------------|----------|
| Fe-N/C/rGO | 750                        | 5                 | 6.3      |
|            | 750                        | 10                | 5.8      |
|            | 750                        | 15                | 4.7      |
|            | 750                        | 20                | 3.5      |
|            | 650                        | 10                | 20.6     |
|            | 850                        | 10                | 3.6      |
|            | 950                        | 10                | 2.5      |



Table S3. Comparison of ORR performance with various Fe-based catalysts in acidic electrolyte.

| Sample           | $\Delta E_{1/2}$<br>(mV)* | Scan rate<br>(mV s <sup>-1</sup> ) | Rotation<br>rate<br>(rpm) | Current<br>density at<br>0.4V<br>vs.RHE<br>(mA cm <sup>-2</sup> ) | Electrolyte                             | References                                                     |
|------------------|---------------------------|------------------------------------|---------------------------|-------------------------------------------------------------------|-----------------------------------------|----------------------------------------------------------------|
| Fe-N/C/rGO-LH    | 69                        | 5                                  | 1600                      | 3.8                                                               | 0.5 M<br>H <sub>2</sub> SO <sub>4</sub> | This work                                                      |
| Fe/N/C           | ~200                      | 5                                  | 1600                      | 3.3                                                               | 0.5 M<br>H <sub>2</sub> SO <sub>4</sub> | <i>J. Phys. Chem. C</i> ,<br>2016, 120,<br>1586–1596           |
| Fe/N/G           | ~150                      | 10                                 | 1600                      | 4.5                                                               | 0.1 M<br>HClO <sub>4</sub>              | <i>Appl. Catal. B-<br/>Environ.</i> , 2016, 183,<br>185–196    |
| Fe-N/MC@0.6      | ~170                      | 10                                 | 1600                      | 4.7                                                               | 0.1 M<br>HClO <sub>4</sub>              | <i>ChemCatChem</i><br>2015,7, 2937-2944                        |
| Fe-N/C NNs       | 108                       | 10                                 | 1600                      | 4.05                                                              | 0.5 M<br>H <sub>2</sub> SO <sub>4</sub> | <i>Sci. Rep.</i> ,<br>2015, 11, 17396                          |
| Fe-N/CNN3        | ~150                      | 10                                 | 1600                      | 2.8                                                               | 0.5 M<br>H <sub>2</sub> SO <sub>4</sub> | <i>Appl. Catal. B-<br/>Environ.</i> , 2015, 166–<br>167, 75–83 |
| N-Fe/G(60)-900-S | 89                        | 10                                 | 1600                      | 5.81                                                              | 0.1 M<br>HClO <sub>4</sub>              | <i>Nanoscale</i> ,<br>2015, 7, 14707-<br>14714                 |
| Fe-N-HCMS        | 150                       | 10                                 | 2025                      | 6.5                                                               | 0.5 M<br>H <sub>2</sub> SO <sub>4</sub> | <i>Adv. Energy Mater.</i> ,<br>2014, 4                         |
| Fe-N/C-800       | 59                        | 10                                 | 1600                      | 5.6                                                               | 0.1 M<br>HClO <sub>4</sub>              | <i>J. Am. Chem. Soc.</i> ,<br>2014, 136, 11027–<br>11033       |

\*  $\Delta E_{1/2}$  represents the difference in the half-wave potentials between Pt/C catalyst and the sample catalyst, i.e.,  $\Delta E_{1/2} = E_{1/2}(\text{Pt/C}) - E_{1/2}(\text{sample})$ .
